# Supplementary material for: Unveiling Binge Drinking Trends and Triggers Among Army Personnel: A cross sectional study
Source: Research Square preprint supplement (doi:10.21203/rs.3.rs-5465267/v1), 2025-04-16
Supplement: Supplementary file 1 [file be2f0fd408f571bb3b1e157e.docx]

**Supplementary File I**

***List of Independent Variables Identified from Bivariate Analysis***

| **Variable** | **P value** | **Unadjusted OR** | **95% CI** |
| --- | --- | --- | --- |
| Educational status | 0.098 | 1.24 | 0.97-1.58 |
| Marital status | 0.082 | 1.26 | 0.98-1.6 |
| Medical categorization | 0.01 | 1.77 | 1.15-2.72 |
| Service arm | 0.086 | 1.27 | 0.98-1.64 |
| Additional income | 0.111 | 0.76 | 0.55-1.05 |
| Combat exposure | 0.094 | 1.26 | 0.97- 1.64 |
| Serious consequences | 0.001 | 2.65 | 1.99-3.53 |
| Risk behaviours | 0.001 | 2.08 | 1.63- 2.66 |
| Alcohol related productivity losses | 0.001 | 3.21 | 1.92- 5.36 |
| Usual driving habit | 0.003 | 1.53 | 1.16- 2.02 |
| Seat belt use | 0.003 | 1.56 | 1.17- 2.10 |
| Ever had sex with a commercial sex worker | 0.001 | 2.23 | 1.48- 3.35 |
| Multiple sexual partners | 0.013 | 1.86 | 1.16- 3.00 |
| Sleep disturbances | 0.011 | 1.64 | 1.13-2.36 |
| Ever tried to kill yourself | 0.001 | 3.55 | 1.78- 7.08 |
| Smoking tobacco use | 0.001 | 2.13 | 1.65- 2.74 |
| Smokeless tobacco use | 0.005 | 1.63 | 1.16- 2.27 |
| Cannabis use | 0.001 | 2.43 | 1.87- 3.16 |
| SF-36 item- Cut down the amount of time spent on work or other activities | 0.001 | 2.86 | 1.60- 5.11 |
| SF-36 item- Accomplished less than would like | 0.001 | 2.5 | 1.61- 3.88 |
| SF-36 item- Were limited in the kind of work or other activities | 0.001 | 1.93 | 1.34- 2.78 |
| SF-36 item- Had difficulty performing the work or other activities | 0.001 | 2.17 | 1.52- 3.09 |
| Mental distress | 0.001 | 3.35 | 2.46- 4.58 |
| Childhood physical abuse | 0.003 | 1.68 | 1.19- 2.35 |
| Domestic violence during childhood | 0.102 | 1.51 | 0.95- 2.40 |
| Childhood sexual abuse | 0.002 | 2.06 | 1.31- 3.25 |
| Living with a problem drinker/alcoholic | 0.137 | 1.3 | 0.94- 1.82 |
| Induced to drink during childhood | 0.003 | 2.44 | 1.35- 4.39 |
